# Supplementary material
Source: PubMed Central journal article supplement (PMC7259440)
Supplement: NIHMS1569361-supplement-Methods_S1.pdf [file NIHMS1569361-supplement-Methods_S1.pdf]

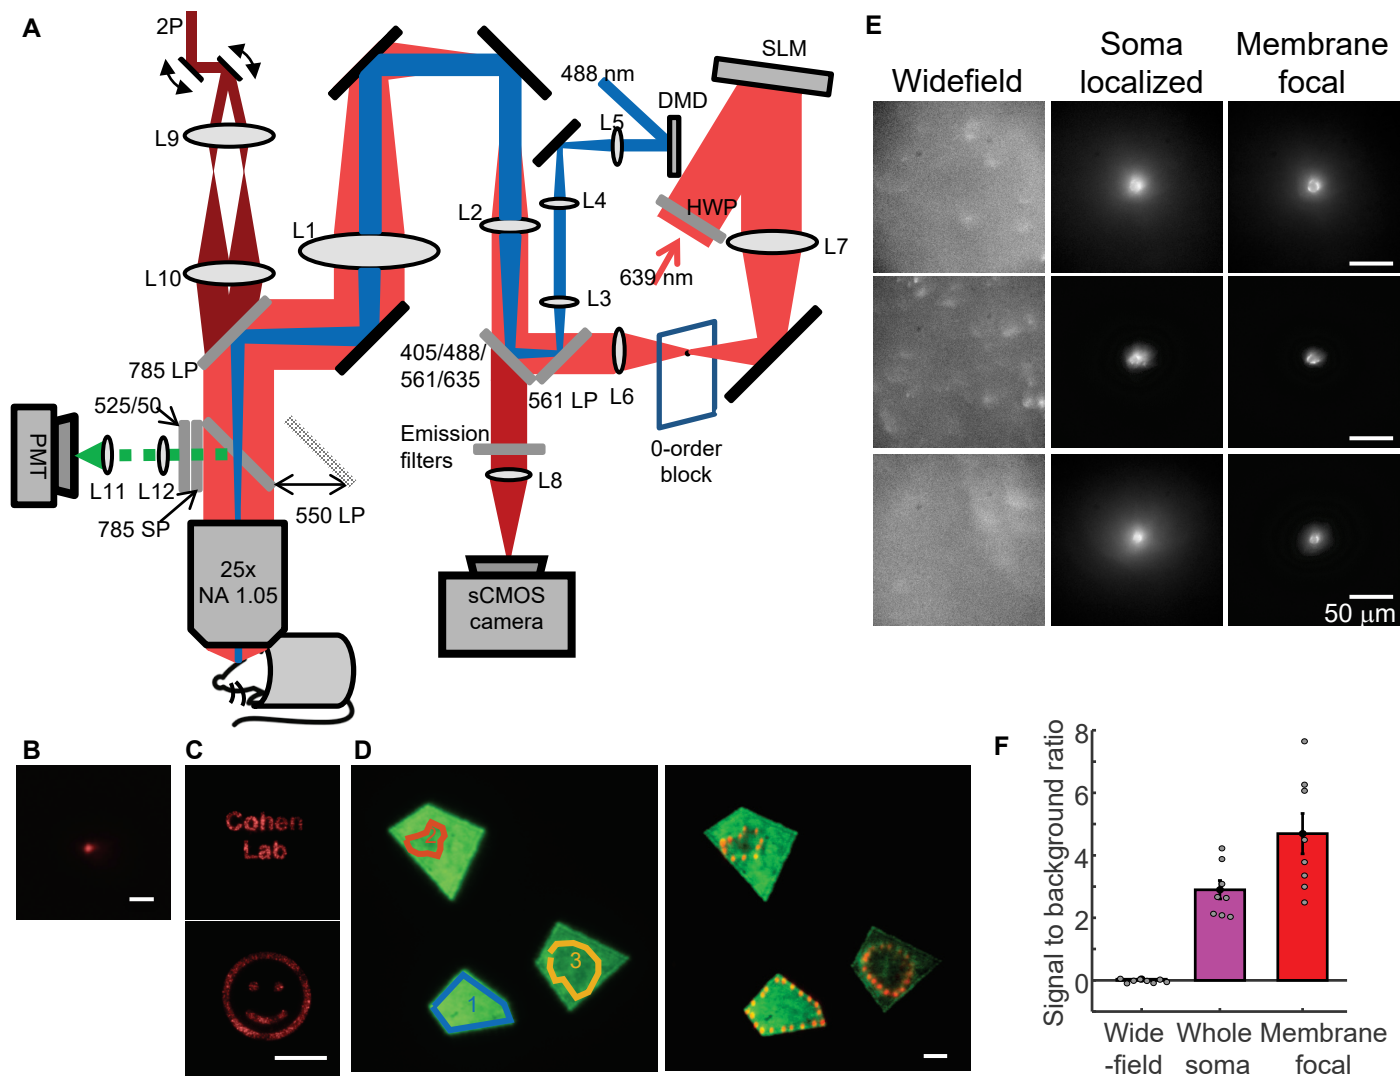

**Methods S1. Instrumentation for holographic voltage imaging and patterned optogenetic stimulation, Related to STAR Methods Holographic Optical System.** (A) Layout of the optical setup. The spatial light modulator (SLM) diffractively patterned the red laser ( $\lambda = 639$  nm) into a set of discrete foci on the sample for holographic structured illumination excitation of a far red GEVI. The digital micromirror device (DMD) acted as a binary amplitude mask and projected a pattern of blue light onto the sample for targeted optogenetic activation of a blue-excited channelrhodopsin. Fluorescence from the sample was imaged onto a scientific CMOS camera. For two-photon (2P) imaging, pulsed infrared light ( $\lambda = 920$  nm) was scanned by a pair of galvo mirrors. A dichroic mirror was inserted into the beam path to direct green fluorescence onto a photomultiplier (PMT). Parts list in Table S1. Not shown: beam expansion and polarization control optics for each of the laser beams. (B) Point-spread function of the red illumination. Scale bar 10  $\mu$ m. (C) Diffractively patterned red light illumination patterns projected onto a homogeneous fluorescent test sample. Scale bar 50  $\mu$ m. (D) Combination of patterned blue and red illumination. Left: Patterns of fluorescence excited by blue light projected onto a homogeneous fluorescent test sample. Target patterns for the red illumination were manually defined. Right: Superposition of image of the red illumination on the green fluorescence excited by blue illumination. Scale bar 10  $\mu$ m. (E) Representative images in the SomArchon fluorescence channel showing wide-field, cell-localized whole soma, and holographic membrane focal illumination. Each row contains three images of the same field of view. (F) Quantification of the signal (fluorescence in the cell area) to background (fluorescence in the surrounding region) ratio for the three illumination schemes. Wide-field and membrane focal data are as in Fig. 1C.
