# Supplementary material
Source: PubMed Central journal article supplement (PMC7259440)
Supplement: NIHMS1569361-supplement-Methods_S2.pdf [file NIHMS1569361-supplement-Methods_S2.pdf]

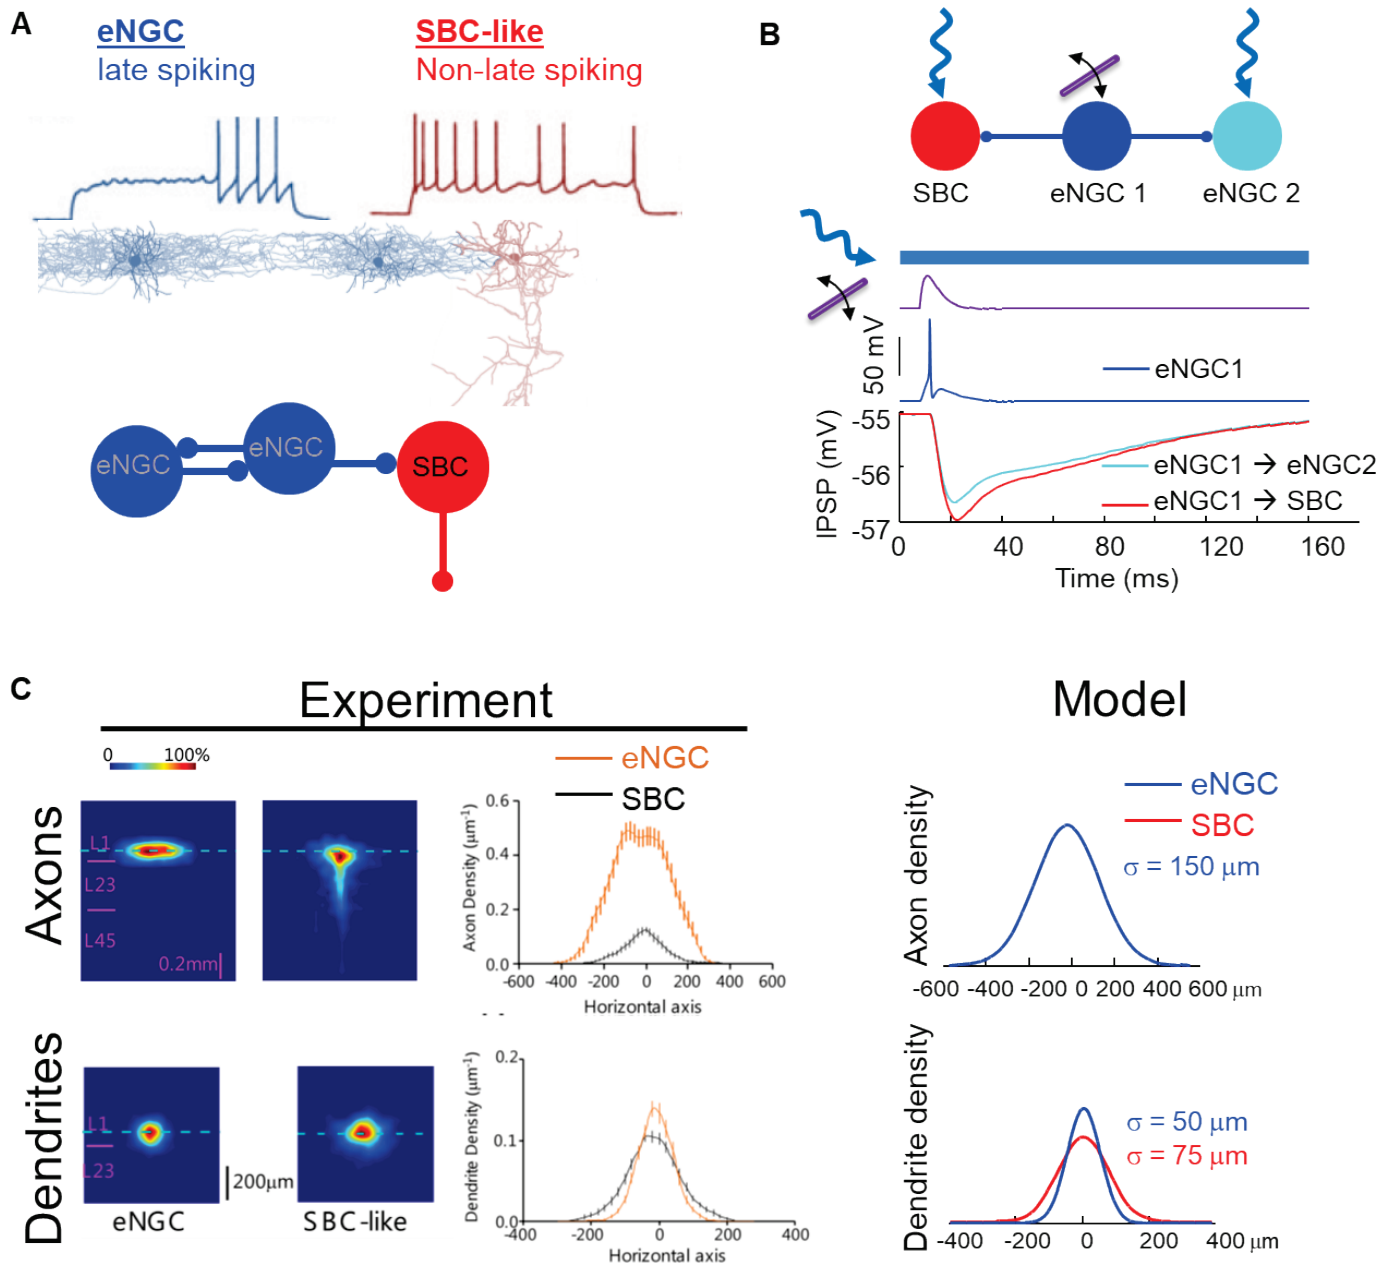

**Methods S2. Synaptic and morphological parameters in model of L1 microcircuit, Related to STAR Methods Numerical model of L1 dynamics.** (A) Characteristic morphology and spiking patterns of L1 interneurons. Electrophysiology traces adapted from Ref (13) and neuronal morphologies from Ref (9). Manual patch clamp recordings were acquired near rheobase. The eNGC cells form a mutually inhibitory network within L1. Downward-projecting SBC-like neurons receive inhibition from the eNGC network but do not have outputs within L1. (B) Model for synaptic inhibition. A simulated eNGC cell was stimulated to spike once. The simulated postsynaptic cells were optogenetically depolarized to -55 mV to introduce a driving force for  $\text{Cl}^-$  entry. The time-course and amplitudes of the postsynaptic inhibitory conductances were adjusted to match experimental IPSPs of -1.5 to -2 mV. (C) Length-scale of connectivity. Data from (9). Synaptic weights were set by Gaussian distributions fit to the experimental data. The length-scale of each synaptic connection was set to the sum of the widths of the axonal and dendritic arbors.
