# Supplementary material
Source: PubMed Central journal article supplement (PMC7259440)
Supplement: NIHMS1569361-supplement-Tables_S1-S2.pdf [file NIHMS1569361-supplement-Tables_S1-S2.pdf]

**Cell, Volume 180**

## **Supplemental Information**

### **All-Optical Electrophysiology Reveals the Role of Lateral Inhibition in Sensory Processing in Cortical Layer 1**

**Linlin Z. Fan, Simon Kheifets, Urs L. Böhm, Hao Wu, Kiryl D. Piatkevich, Michael E. Xie, Vicente Parot, Yooree Ha, Kathryn E. Evans, Edward S. Boyden, Anne E. Takesian, and Adam E. Cohen**

| Item            | Part number                                                                                     | Comments                                                                                                                                              |
|-----------------|-------------------------------------------------------------------------------------------------|-------------------------------------------------------------------------------------------------------------------------------------------------------|
| 2P Laser        | Coherent DeepSee                                                                                |                                                                                                                                                       |
| Scanning galvos | Cambridge Technologies 6215H                                                                    |                                                                                                                                                       |
| PMT             | Hamamatsu, H11706P-40                                                                           |                                                                                                                                                       |
| 25x objective   | Olympus XLPLN25XWMP2                                                                            |                                                                                                                                                       |
| L1              | 400 mm, Edmund, 88-598-INK                                                                      |                                                                                                                                                       |
| L2              | Effective focal length, 150 mm, two 300 mm lenses, Thorlabs, AC508-300-A-ML                     | Two lenses back to back in Plössl configuration to reduce aberration                                                                                  |
| L3              | 75 mm, Thorlabs, AC254-075-A-ML                                                                 | Relay lens to allow more space                                                                                                                        |
| L4              | 75 mm, Thorlabs, AC254-075-A-ML                                                                 | Relay lens to allow more space                                                                                                                        |
| L5              | 60 mm, Thorlabs, AC254-060-A-ML                                                                 |                                                                                                                                                       |
| L6              | First generation: Sigma macro 18-200 mm<br>Second generation: 75 mm, Thorlabs, AC508-075-A-ML   | First generation: Zoom lens for varying NA of red illumination and size of red targeted region;<br>Second generation: 75 mm lens to reduce aberration |
| L7              | 200 mm, Thorlabs, AC508-200-A-ML                                                                |                                                                                                                                                       |
| L8              | 45 mm, Olympus XLFLUOR 4X/340                                                                   | Objective used as a tube lens for reducing aberration and achieving large field of view                                                               |
| L9              | Thorlabs, SL50-CLS2                                                                             | Optimized scan lens                                                                                                                                   |
| L10             | Thorlabs, TL200-CLS2                                                                            | Optimized tube lens                                                                                                                                   |
| L11             | 16 mm, Thorlabs, AC080-016-A-ML                                                                 |                                                                                                                                                       |
| L12             | 75 mm singlet, Thorlabs, LA1608-A-ML                                                            |                                                                                                                                                       |
| 488 nm laser    | Cobolt, 06-01 series, $\lambda = 488$ nm, 60 mW                                                 |                                                                                                                                                       |
| AOTF            | Gooch and Housego TF525-250-6-3-GH18A                                                           |                                                                                                                                                       |
| DMD             | Vialux, V-7001 VIS                                                                              |                                                                                                                                                       |
| 639 nm laser    | CNI Inc., MRL-FN-639, $\lambda = 639$ nm, 700 mW single transverse mode                         |                                                                                                                                                       |
| SLM             | Meadowlark 1920SLM VIS                                                                          |                                                                                                                                                       |
| 0-order block   | home-made anti-pinhole comprised of a dot of solder on a glass slide                            |                                                                                                                                                       |
| sCMOS camera    | Hamamatsu ORCA-Flash 4.0                                                                        |                                                                                                                                                       |
| Sample stage    | Sutter instrument, FG-MPC78, Moving stage plat W/MPC-200 for XY stage; SA-MP285-1X-M for Z axis |                                                                                                                                                       |
| DAQ system      | NI PCIe-6363                                                                                    |                                                                                                                                                       |

**Table S1. Related to Figure 1.** Components required to build an optical system for holographic structured illumination voltage imaging combined with patterned optogenetic stimulation.

| Parameter                                   | eNGC neuron                                       | SBC-like neuron           | Meaning and comments                                                                                                                                                                                                                                                                                           |
|---------------------------------------------|---------------------------------------------------|---------------------------|----------------------------------------------------------------------------------------------------------------------------------------------------------------------------------------------------------------------------------------------------------------------------------------------------------------|
| $g_{Na}$                                    | 35 mS/cm <sup>2</sup>                             | 35 mS/cm <sup>2</sup>     | Voltage gated Na <sup>+</sup> channel                                                                                                                                                                                                                                                                          |
| $g_K$                                       | 9 mS/cm <sup>2</sup>                              | 9 mS/cm <sup>2</sup>      | Voltage gated K <sup>+</sup> channel                                                                                                                                                                                                                                                                           |
| $g_L$                                       | 0.23 mS/cm <sup>2</sup>                           | 0.23 mS/cm <sup>2</sup>   | leak conductance                                                                                                                                                                                                                                                                                               |
| $g_A$                                       | 10 mS/cm <sup>2</sup>                             | 0                         | A-type inactivating potassium current                                                                                                                                                                                                                                                                          |
| $g_{SK2}$                                   | 0                                                 | 10 mS/cm <sup>2</sup>     | Slow outward potassium current                                                                                                                                                                                                                                                                                 |
| $E_{Na}$                                    | 55 mV                                             | 55 mV                     | Na <sup>+</sup> reversal potential                                                                                                                                                                                                                                                                             |
| $E_K$                                       | -90 mV                                            | -90 mV                    | K <sup>+</sup> reversal potential                                                                                                                                                                                                                                                                              |
| $E_{leak}$                                  | -66.4 mV                                          | -66.8 mV                  | Resting membrane potential; set at -55 mV for high spontaneous activity to mimic awake state                                                                                                                                                                                                                   |
| $E_A$                                       | -75 mV                                            |                           | Reversal potential for $g_A$                                                                                                                                                                                                                                                                                   |
| $E_{SK2}$                                   |                                                   | -70 mV                    | Reversal potential for $g_{SK2}$                                                                                                                                                                                                                                                                               |
| $\tau$                                      | 4.3 ms                                            | 4.3 ms                    | Membrane time constant                                                                                                                                                                                                                                                                                         |
| $C_m$                                       | 1 $\mu$ F/cm <sup>2</sup>                         | 1 $\mu$ F/cm <sup>2</sup> | Membrane capacitance                                                                                                                                                                                                                                                                                           |
| $E_{ChR^2}$ , $E_{AMPA^2}$ ,<br>$E_{nAChR}$ | 0 mV                                              | 0 mV                      | Reversal potential of excitatory conductances                                                                                                                                                                                                                                                                  |
| $E_{GABAR}$                                 | -70 mV                                            | -70 mV                    | Reversal potential of inhibitory (GABA <sub>A</sub> -mediated) conductances                                                                                                                                                                                                                                    |
| Parameter                                   | Source Data                                       |                           | Model                                                                                                                                                                                                                                                                                                          |
| eNGC firing pattern                         | Chu et al. J. Neurosci. 23 (2003): 96-102. Fig. 1 |                           | Modified from Wang, Xiao-Jing, and György Buzsáki. <i>Journal of neuroscience</i> 16.20 (1996): 6402-6413.<br>Added A-type inactivating potassium current from (Ermentrout, G. Bard, and David H. Terman. <i>Mathematical foundations of neuroscience</i> . Vol. 35. Springer Science & Business Media, 2010.) |
| SBC firing                                  | Chu et al. J. Neurosci. 23 (2003):                |                           | Modified from Wang, Xiao-Jing, and György                                                                                                                                                                                                                                                                      |

|                                              |                                                                                                                   |                                                                                                                                                                                                                                                         |
|----------------------------------------------|-------------------------------------------------------------------------------------------------------------------|---------------------------------------------------------------------------------------------------------------------------------------------------------------------------------------------------------------------------------------------------------|
| pattern                                      | 96-102. Fig. 1                                                                                                    | Buzsáki. <i>Journal of neuroscience</i> 16.20 (1996): 6402-6413.<br>Added a slow potassium current from (Ermentrout, G. Bard, and David H. Terman. <i>Mathematical foundations of neuroscience</i> . Vol. 35. Springer Science & Business Media, 2010.) |
| IPSP waveform:<br>eNGC → eNGC                | Chu et al. J. Neurosci. 23 (2003): 96-102. Fig. 5                                                                 | $g_{inh}(t) = g_{inh}^0 \left( \frac{t}{\tau_1} e^{1-\frac{t}{\tau_1}} + 0.6 \frac{t}{\tau_2} e^{1-\frac{t}{\tau_2}} \right)$<br>$g_{inh}^0 = 0.035 - 0.04 \text{ mS/cm}^2, \tau_1 = 5 \text{ ms}, \tau_2 = 30 \text{ ms}$                              |
| IPSP amplitude<br>eNGC → eNGC                | Jiang et al. Science 350 (2015): aac9462. Table S6                                                                | -1.6 mV                                                                                                                                                                                                                                                 |
| IPSP waveform<br>eNGC → SBC                  | Chu et al. J. Neurosci. 23 (2003): 96-102. Fig. 4<br>Jiang et al. Science 350 (2015): aac9462. Fig. 3a            | $g_{inh}(t) = g_{inh}^0 \left( \frac{t}{\tau_1} e^{1-\frac{t}{\tau_1}} + 0.6 \frac{t}{\tau_2} e^{1-\frac{t}{\tau_2}} \right)$<br>$g_{inh}^0 = 0.035 - 0.04 \text{ mS/cm}^2, \tau_1 = 5 \text{ ms}, \tau_2 = 30 \text{ ms}$                              |
| IPSP amplitude<br>eNGC → SBC                 | Jiang et al. Science 350 (2015): aac9462. Table S6                                                                | -1.8 mV                                                                                                                                                                                                                                                 |
| Length scale of<br>eNGC → eNGC<br>coupling   | Jiang et al. Science 350 (2015): aac9462. Figs. S2, S3                                                            | $\sigma = 200 \mu\text{m}$ (sum of axonal and dendritic length scales)                                                                                                                                                                                  |
| Length scale of<br>eNGC → SBC<br>coupling    | Jiang et al. Science 350 (2015): aac9462. Figs. S2, S3                                                            | $\sigma = 225 \mu\text{m}$ (sum of eNGC axonal and SBC dendritic length scales)                                                                                                                                                                         |
| L1 neuron<br>density                         | Abdelfattah et al., BioRxiv: /10.1101/436840. Fig. S23<br>Meyer et al., PNAS 110 (2013) 19113-19118. Table S3     | 3000-7,000 $\text{mm}^{-3}$ , 15 – 67 neurons/barrel (in rat)                                                                                                                                                                                           |
| Ratio of eNGC<br>to SBC cells                | Schuman et al. J. Neurosci. 39 (2019): 125-139. Fig. 2,4                                                          | ~2:1                                                                                                                                                                                                                                                    |
| Thalamocortical<br>EPSP waveform<br>in eNGC  | Zhu and Zhu, J. Neurosci. 24 (2004): 1272-1279. Fig. 2                                                            | $g_{exc}(t) = g_{exc}^0 \frac{t}{\tau} e^{1-\frac{t}{\tau}}$<br>$g_{exc}^0 = 0.05 \text{ mS/cm}^2, \tau = 3 \text{ ms}$                                                                                                                                 |
| Thalamocortical<br>EPSP amplitude<br>in eNGC | Zhu and Zhu, J. Neurosci. 24 (2004): 1272-1279. Fig. 2<br>Lee et al., J. Neurosci. 30 (2010): 16796-16808. Fig. 7 | 3 - 7 mV                                                                                                                                                                                                                                                |
| Thalamocortical<br>EPSP waveform             | Zhu and Zhu, J. Neurosci. 24 (2004): 1272-1279. Fig. 2                                                            | $g_{exc}(t) = g_{exc}^0 \frac{t}{\tau} e^{1-\frac{t}{\tau}}$                                                                                                                                                                                            |

|                                           |                                                                                                                                                                                                     |                                                         |
|-------------------------------------------|-----------------------------------------------------------------------------------------------------------------------------------------------------------------------------------------------------|---------------------------------------------------------|
| in SBC                                    |                                                                                                                                                                                                     | $g_{exc}^0 = 0.04 \text{ mS/cm}^2, \tau = 3 \text{ ms}$ |
| Thalamocortical EPSP amplitude in SBC     | Zhu and Zhu, J. Neurosci. 24 (2004): 1272-1279. Fig. 2<br>Lee et al., J. Neurosci. 30 (2010): 16796-16808. Fig. 7<br>(But see also Cruikshank et al. J. Neurosci. 32 (2012): 127813-17823. Fig. 4d) | 3 - 7 mV                                                |
| Strength of neuromodulatory input to eNGC | Unknown                                                                                                                                                                                             | Assumed to be same for eNGC and SBC                     |
| Strength of neuromodulatory input to SBC  | Unknown                                                                                                                                                                                             | Assumed to be same for eNGC and SBC                     |

**Table S2. Related to Figure 7.** Parameters of conductance-based models of L1 interneuron network. At the top of the table are the intrinsic electrophysiological properties of the individual eNGC and SBC-like neurons. At the bottom of the table are parameters related to the network. Some parameters were from data in rats or from different brain regions. We verified that where there was uncertainty in parameter values, the simulation results did not qualitatively depend on precise parameter values.
